# Supplementary material
Source: PubMed Central journal article supplement (PMC4729773)
Supplement: thnov06p0254s1.pdf [file thnov06p0254s1.pdf]

Supplementary Table 1: Patients' laboratory values

| N o. | Sex | Age | Myeloma type           | Disease duration (months) | $\beta$ 2m (mg/l) | Albumin (g/dl) | Creatinine (mg/dl) | LDH (U/l) | Cytogenetics |
|------|-----|-----|------------------------|---------------------------|-------------------|----------------|--------------------|-----------|--------------|
| 1    | m   | 76  | IgG $\kappa$           | PD                        | 5.5               | 4.3            | 2.11               | 179       | other        |
| 2    | f   | 64  | Plasmocytoma $\lambda$ | PD                        | 1.5               | 4.5            | 0.84               | 184       | other        |
| 3    | f   | 65  | IgA $\kappa$           | PD                        | 2.0               | 6.0            | 0.67               | 138       | high risk    |
| 4    | f   | 65  | IgA $\kappa$           | 3                         | 2.3               | 3.7            | 0.63               | 228       | high risk    |
| 5    | m   | 64  | IgG $\kappa$           | 4                         | 7.1               | 4.2            | 1.05               | 157       | other        |
| 6    | f   | 60  | IgG $\kappa$           | 120                       | 8.8               | 3.6            | 1.60               | 239       | other        |
| 7    | m   | 54  | IgA $\kappa$           | PD                        | 5.1               | 4.1            | 1.21               | 126       | other        |
| 8    | f   | 56  | IgA $\lambda$          | PD                        | 4.7               | 3.2            | 0.96               | 89        | other        |
| 9    | m   | 60  | IgA $\lambda$          | 9                         | 8.1               | 4.3            | 1.68               | 3669      | high risk    |
| 10   | m   | 82  | IgA $\kappa$           | 55                        | 3.5               | 4.0            | 1.34               | 257       | high risk    |
| 11   | m   | 67  | IgG $\lambda$          | 15                        | 2.4               | 4.1            | 1.03               | 221       | high risk    |
| 12   | m   | 59  | light chain $\kappa$   | 7                         | n/a               | 4.7            | 0.91               | 193       | other        |
| 13   | m   | 48  | IgG $\kappa$           | PD                        | 2.7               | 3.6            | 0.81               | 102       | other        |
| 14   | m   | 70  | IgG $\kappa$           | 103                       | 5.4               | 3.6            | 1.43               | 193       | other        |
| 15   | f   | 69  | IgG $\kappa$           | 10                        | 3.2               | 4.0            | 0.83               | 214       | high risk    |
| 16   | f   | 63  | light chain $\kappa$   | 32                        | 5.9               | 4.5            | 1.14               | 247       | high risk    |
| 17   | f   | 74  | IgG $\lambda$          | PD                        | 17.8              | 4.3            | 2.21               | 172       | high risk    |
| 18   | f   | 64  | IgA $\kappa$           | 6                         | 1.2               | 3.9            | 0.57               | 21        | high risk    |

|           |   |    |                  |     |      |     |      |          | 7         |
|-----------|---|----|------------------|-----|------|-----|------|----------|-----------|
| <b>19</b> | m | 56 | IgA κ            | 32  | 3.6  | 3.2 | 0.73 | 14<br>7  | other     |
| <b>20</b> | f | 62 | IgG κ            | 11  | 1.8  | 4.4 | 0.66 | 17<br>7  | other     |
| <b>21</b> | m | 63 | light chain<br>κ | PD  | 5.1  | 5.3 | 0.95 | 19<br>5  | high risk |
| <b>22</b> | f | 48 | IgA λ            | 63  | 2.0  | 4.5 | 0.60 | 20<br>6  | n/a       |
| <b>23</b> | m | 51 | IgG κ            | 34  | 5.2  | 4.0 | 0.80 | 11<br>65 | high risk |
| <b>24</b> | m | 47 | light chain<br>κ | PD  | 2.5  | 4.8 | 0.95 | 74<br>9  | high risk |
| <b>25</b> | m | 62 | light chain<br>λ | PD  | 1.5  | 4.2 | 0.74 | 17<br>5  | n/a       |
| <b>26</b> | m | 59 | IgG κ            | 37  | 1.7  | 4.6 | 0.84 | 19<br>4  | high risk |
| <b>27</b> | m | 59 | IgG κ            | 4   | 1.9  | 3.8 | 0.89 | 16<br>8  | n/a       |
| <b>28</b> | m | 65 | IgG κ            | 89  | 3.2  | 4.9 | 0.87 | 22<br>7  | n/a       |
| <b>29</b> | f | 65 | IgA κ            | 12  | 6.4  | 4.0 | 0.75 | 32<br>4  | high risk |
| <b>30</b> | f | 39 | IgG λ            | 58  | n/a  | 4.8 | 0.80 | 29<br>7  | high risk |
| <b>31</b> | f | 68 | IgG λ            | 31  | 2.5  | 3.9 | 0.80 | 16<br>9  | high risk |
| <b>32</b> | m | 73 | IgG κ            | 72  | 17.7 | 4.9 | 1.84 | 38<br>4  | n/a       |
| <b>33</b> | m | 62 | IgG κ            | 199 | 8.4  | 3.3 | 1.29 | 57<br>3  | n/a       |
| <b>34</b> | m | 62 | light chain<br>λ | 47  | 1.8  | 4.4 | 1.10 | 17<br>4  | high risk |
| <b>35</b> | m | 72 | IgG λ            | PD  | 9.6  | 3.8 | 1.22 | 16<br>6  | other     |
| <b>36</b> | f | 53 | light chain<br>κ | 122 | 2.4  | 4.8 | 1.19 | 27<br>0  | other     |
| <b>37</b> | m | 63 | light chain<br>λ | 6   | 1.5  | 4.4 | 0.66 | 20<br>7  | other     |

|           |   |    |                  |    |     |     |      |         |           |
|-----------|---|----|------------------|----|-----|-----|------|---------|-----------|
| <b>38</b> | f | 63 | IgG κ            | 22 | 5.7 | 3.9 | 0.78 | 15<br>9 | other     |
| <b>39</b> | m | 63 | IgG κ            | 86 | 2.1 | 4.0 | 0.81 | 23<br>3 | n/a       |
| <b>40</b> | m | 60 | light chain<br>λ | 22 | 3.7 | 3.9 | 0.89 | 18<br>4 | high risk |
| <b>41</b> | f | 63 | light chain<br>λ | 23 | 2.3 | 3.6 | 0.90 | 20<br>3 | n/a       |
| <b>42</b> | f | 49 | IgA λ            | 72 | n/a | 4.3 | 0.58 | 22<br>9 | n/a       |
| <b>43</b> | f | 40 | light chain<br>κ | 39 | 1.8 | 4.2 | 0.75 | 15<br>2 | n/a       |

Supplementary Table 2: Correlation of bone marrow involvement and MET/FDG uptake

| Patient | BM infiltration (%) | MET                 |                    | FDG                 |                    |
|---------|---------------------|---------------------|--------------------|---------------------|--------------------|
|         |                     | SUV <sub>mean</sub> | SUV <sub>max</sub> | SUV <sub>mean</sub> | SUV <sub>max</sub> |
| 1       | 40                  | 5.51                | 8.98               | 2.06                | 3.07               |
| 2       | 0                   | 2.82                | 3.67               | 1.16                | 1.54               |
| 3       | 30                  | 4.52                | 6.52               | 1.45                | 2.18               |
| 4       | 50                  | 5.65                | 8.69               | 5.93                | 8.59               |
| 5       | 40                  | 4.78                | 7.46               | 7.25                | 12.21              |
| 7       | 70                  | 9.04                | 12.11              | 2.56                | 3.26               |
| 8       | 25                  | 4.29                | 6.17               | 2.82                | 3.8                |
| 9       | 90                  | 6.57                | 8.78               | 1.87                | 2.19               |
| 11      | 5                   | 2.88                | 4.67               | 1.48                | 1.8                |
| 18      | 0                   | 1.11                | 1.88               | 1.18                | 1.41               |
| 19      | 50                  | 4.51                | 5.82               | 1.67                | 2.46               |
| 20      | 15                  | 3.91                | 5.43               | 1.64                | 2.49               |
| 21      | 70                  | 4.21                | 5.2                | 2.71                | 3.36               |
| 22      | 3                   | 2.17                | 2.43               | 0.8                 | 1.28               |
| 23      | 60                  | 9.03                | 13.93              | 7.58                | 9.71               |
| 24      | 90                  | 9.88                | 15.14              | 3.98                | 5.03               |
| 25      | 15                  | 4.8                 | 5.81               | 2.49                | 2.85               |
| 26      | 0                   | 1.62                | 1.75               | 0.89                | 0.98               |
| 27      | 40                  | 4.55                | 7.31               | 1.89                | 2.71               |
| 29      | 90                  | 8.75                | 13.21              | 3.72                | 6.68               |
| 31      | 35                  | 4.33                | 7.48               | 2                   | 3.64               |
| 32      | 70                  | 7.19                | 8.96               | 9.27                | 13.79              |
| 33      | 20                  | 2.74                | 3.42               | 0.92                | 1.21               |
| 34      | 5                   | 1.86                | 2.56               | 1.17                | 1.84               |
| 35      | 90                  | 9.68                | 16                 | 7.46                | 10.32              |
| 36      | 15                  | 1.73                | 2.35               | 2.07                | 2.7                |
| 37      | 0                   | 2.33                | 2.9                | 1.78                | 2.21               |
| 28      | 30                  | 4.06                | 6.05               | 2.32                | 3.37               |
| 40      | 20                  | 3.79                | 5.29               | 1.68                | 2.03               |
| 41      | 10                  | 2.55                | 3.42               | 1.93                | 2.43               |
| 42      | 0                   | 0.88                | 1.15               | 1.19                | 1.53               |

Given are the respective values of bone marrow (BM) infiltration (in %) as well as both mean (SUV<sub>mean</sub>) and maximum standardized uptake values (SUV<sub>max</sub>) of the biopsied iliac crest.

Supplementary Table 3: Diagnostic Performance of MET and FDG

|                                     | <b>FDG</b> | <b>MET</b> |
|-------------------------------------|------------|------------|
| <b>patient-based analysis</b>       |            |            |
| <i>PET-positive patients</i>        | 76.7%      | 90.7%      |
| <i>appendicular skeleton</i>        | 65.1%      | 86.0%      |
| <i>EMD</i>                          | 23.3%      | 27.9%      |
| <i>LN involvement</i>               | 14.0%      | 16.3%      |
| <i>soft tissue involvement</i>      | 9.3%       | 14.0%      |
| <i>lung involvement</i>             | 4.7%       | 4.7%       |
| <b>lesion-based analysis</b>        |            |            |
| <i>&lt;20 FL</i>                    | 48.5%      | 10.3%      |
| <i>&gt; 20 FL</i>                   | 51.5%      | 89.7%      |
| <b>sub-group analysis &gt;20 FL</b> |            |            |
| <i>&gt;20 FL</i>                    | 9.1%       | 8.6%       |
| <i>&gt;50 FL</i>                    | 12.1%      | 20.0%      |
| <i>&gt;100 FL</i>                   | 30.3%      | 71.4%      |
| <b>total no. EMD FL</b>             | 28         | 42         |

Given are the positive-findings of the patient-based and lesion-based analysis of MET- and FDG-PET/CT, respectively. EMD = extramedullary disease; FL = focal lesion; LN = lymph node
